# Supplementary material for: Measurement and differentiation of banana juice scent using an electronic nose FF-2A
Source: PeerJ. 2021 Jan 5;9:e10638. doi: 10.7717/peerj.10638 (PMC7792514; doi:10.7717/peerj.10638)
Supplement: Supplemental Information 1 [file peerj-09-10638-s001.xlsx]

## Sheet: Fig1
Similarity	shop H	shop O	shop S
Hydrogen sulfide	76.5	5.14	5.67
Sulfur	17.6	12.05	8.52
Ammonia	76.5	5.45	28.43
Amine	40.15	43.95	35.76
Organic acid	8.71	8.83	7.26
Aldehyde	23.74	28.9	9.96
Ester	33.77	35.65	25.3
Aromatic grop	12.5	14.04	9.08
Carbon hydrate	23.11	26.52	14.38
	2019Nov.11	2019Nov.13	2019Nov.15	shopH
Hydrogen sulfide	5.14	75.4	78.96
Sulfur	28.49	9.88	16.86
Ammonia	5.2	75.4	78.96
Amine	38.17	41.43	40.51
Organic acid	9.36	8.45	8.73
Aldehyde	29.81	22.42	24.26
Ester	33.97	34.39	34.5
Aromatic grop	22.11	9.85	12.02
Carbon hydrate	28.89	20.14	22.71

## Sheet: Fig2A
Capture mode
=-LOG10(peak/base)	H 2019Nov.11	H 2019Nov.13	H 2019Nov.15	O 2019Nov.11	O 2019Nov.13	O 2019Nov.15	S 2019Nov.11	H 2019Nov.13	H 2019Nov.15
CH 1	0.51204	0.57568	0.5468	0.58438	0.56922	0.57967	0.58032	0.60957	0.57075
CH 2	1.0745	1.2925	1.2101	1.3043	1.0595	1.2638	1.4836	1.5913	1.4668
CH 3	0.98786	1.0044	1.0001	1.0017	1.0093	0.99643	0.97432	0.97328	0.96809
CH 4	0.13244	0.16762	0.15339	0.17734	0.15579	0.18316	0.21744	0.24136	0.20929
CH 5	1.1659	1.2278	1.2167	1.2392	1.2307	1.2435	1.1984	1.1913	1.1777
CH 6	0.72117	0.9183	0.85758	0.90689	0.76163	0.90397	1.0843	1.1888	1.0721
CH 7	1.1218	1.1629	1.1481	1.1821	1.1437	1.1774	1.143	1.1472	1.1249
CH 8	1.2856	1.5178	1.4504	1.4681	1.3623	1.5382	1.6224	1.7588	1.6481
CH 9	0.16201	0.16396	0.1643	0.18346	0.23363	0.17948	0.1296	0.13137	0.13015
CH 10	0.9096	1.2002	1.1057	1.1584	0.92284	1.1574	1.4544	1.6242	1.4636
Direct mode
CH 1	0.4635	0.39189	0.36942	0.34243	0.20523	0.28488	0.52583	0.48181	0.48046
CH 2	1.206	1.1736	1.1306	1.0529	0.61426	0.96406	1.6355	1.6099	1.5912
CH 3	0.66889	0.74115	0.72069	0.72411	0.62589	0.74599	0.84208	0.84297	0.82979
CH 4	0.1669	0.1718	0.17235	0.16429	0.15436	0.16904	0.21214	0.21156	0.20907
CH 5	0.57651	0.66594	0.6412	0.66275	0.57436	0.69988	0.8263	0.82925	0.79985
CH 6	0.88646	0.90929	0.88929	0.82127	0.66783	0.80528	1.171	1.1619	1.1505
CH 7	1.0591	1.0049	0.99115	0.96136	0.74417	0.92175	1.1071	1.0446	1.0543
CH 8	1.2553	1.2307	1.2201	1.1038	0.91082	1.1279	1.4782	1.4912	1.5399
CH 9	0.19121	0.18267	0.1888	0.16361	0.16285	0.17204	0.1776	0.16969	0.18034
CH 10	0.98629	0.98694	0.95563	0.85465	0.53554	0.83305	1.3969	1.3919	1.3871

## Sheet: Fig3A
		shop H			shop O			shop S
		2019Nov.11	2019Nov.13	2019Nov.15	2019Nov.11	2019Nov.13	2019Nov.15	2019Nov.11	2019Nov.13	2019Nov.15
	Shop H	92.02	98.99	98.01	90.9	79.09	92.67	82.8	81.43	83.01
	Shop O	78.73	68.84	72.56	70.07	96.18	74.12	47.8	42.24	47.47
	Shop S	73.05	80.59	77.98	78.18	58.31	73.81	95.92	98.95	97

## Sheet: Fig3B
		self similarity
	juice	shop S	shop O	shop H
	0h_1	78.68	67.41	85.61
	0h_2	87.12	58.77	86.83
	0h_3	88.21	58.87	86.27
	1h_1	87.85	61.11	88.07
	1h_2	87.04	62.84	88.1
	1h_3	88.13	61	86.57
	3h_1	90.07	55.83	85.44
	3h_2	89.92	55.31	84.67
	3h_3	91.38	47.22	80.44
	6h_1	88.91	55.87	83.92
	6h_2	86.39	62.66	84.31
	6h_3	89.11	56.3	82.25
		0 Hour	sd	1Hour	sd	3 Hour	sd	6 Hour	sd
	Shop S	84.67	5.21604	87.6733	0.566068	90.4567	0.80314	88.1367	1.51596
	Shop O	61.6833	4.95969	61.65	1.03204	52.7867	4.82788	58.2767	3.80216
	Shop H	86.2367	0.610683	87.58	0.874814	83.5167	2.69214	83.4933	1.09427

## Sheet: Fig4
Capture mode
=-LOG10(peak/base)	0 hour	sd	1 hour	sd	3 hour	sd	6 hour	sd
CH 1	0.59461	0.0092615	0.55926	0.0065686	0.56953	0.0084986	0.55457	0.019287
CH 2	1.3193	0.070528	1.2785	0.019693	1.4142	0.068388	1.2989	0.086915
CH 3	0.97567	0.010422	0.97333	0.0042422	0.975	0.0027004	0.95653	0.0027617
CH 4	0.15072	0.012359	0.14282	0.0051242	0.17061	0.010986	0.13359	0.020037
CH 5	1.1579	0.025199	1.1488	0.014182	1.1885	0.0048845	1.1225	0.036626
CH 6	0.90878	0.069566	0.88073	0.018908	0.98831	0.057053	0.89414	0.069086
CH 7	1.182	0.021584	1.1366	0.0047108	1.1355	0.0018139	1.1165	0.022505
CH 8	1.4861	0.053572	1.4352	0.020346	1.5278	0.049123	1.4175	0.077124
CH 9	0.15923	0.0081073	0.15049	0.003884	0.13354	0.0031139	0.14315	0.0088249
CH 10	1.2811	0.078944	1.203	0.025061	1.3317	0.083434	1.1891	0.099377
Direct mode
CH 1	0.3361	0.0029506	0.34794	0.013607	0.4014	0.0054215	0.38557	0.040694
CH 2	0.85564	0.057758	0.91976	0.039536	1.1388	0.025837	1.0111	0.12901
CH 3	0.59524	0.043056	0.60088	0.018483	0.68733	0.020382	0.61946	0.05919
CH 4	0.10081	0.0012067	0.099633	0.0067486	0.12139	0.0029426	0.09988	0.015801
CH 5	0.50776	0.04299	0.51959	0.022098	0.62805	0.024898	0.53187	0.073105
CH 6	0.6731	0.035014	0.70643	0.027081	0.84814	0.015061	0.76961	0.083048
CH 7	0.96633	0.017747	0.96322	0.014644	0.99192	0.0075525	0.97198	0.047098
CH 8	0.99809	0.030056	1.0376	0.028599	1.1706	0.0057553	1.0957	0.087275
CH 9	0.15185	0.0049778	0.15754	0.00036226	0.1557	0.0059212	0.1571	0.0037164
CH 10	0.71013	0.04028	0.75225	0.034039	0.93474	0.018122	0.81731	0.1121

## Sheet: Fig8
Esterase activity
	RFU
Banana	27357
Namwah banana	15331
Island banana	3229.2
Strawberry	9.1556
Melon	18016
Kiwi	1.5556
Mango	1.1556
Persimmon	7150

## Sheet: Fig9A
Capture mode
=-LOG10(peak/base)	standard banana	Namwah banana	Island banana
CH 1	0.57075	0.31391	0.39217
CH 2	1.4668	0.51072	0.75215
CH 3	0.96809	0.75098	0.82816
CH 4	0.20929	0.03324	0.05701
CH 5	1.1777	0.70946	0.84363
CH 6	1.0721	0.35277	0.5074
CH 7	1.1249	0.76351	0.91402
CH 8	1.6481	0.69875	0.91597
CH 9	0.13015	0.2169	0.17474
CH 10	1.4636	0.41894	0.63638
Direct mode
CH 1	0.48046	0.12701	0.23388
CH 2	1.5912	0.26202	0.56561
CH 3	0.82979	0.18375	0.34943
CH 4	0.20907	0.06329	0.07242
CH 5	0.79985	0.15259	0.26832
CH 6	1.1505	0.35937	0.5055
CH 7	1.0543	0.39244	0.74371
CH 8	1.5399	0.57169	0.8113
CH 9	0.18034	0.12574	0.1645
CH 10	1.3871	0.22097	0.46727
